# Supplementary material
Source: MDPI journal article supplement (https://www.mdpi.com/1996-1073/11/1/216)
Supplement: s1 [file s1]

# Hydrothermal Carbonization: Modeling, Final Properties Design and Applications: A Review

Silvia Román, Judy Libra, Nicole Berge, Eduardo Sabio, Kyoung Ro, Liang Li, Beatriz Ledesma, Andrés Álvarez and Sunny Bae

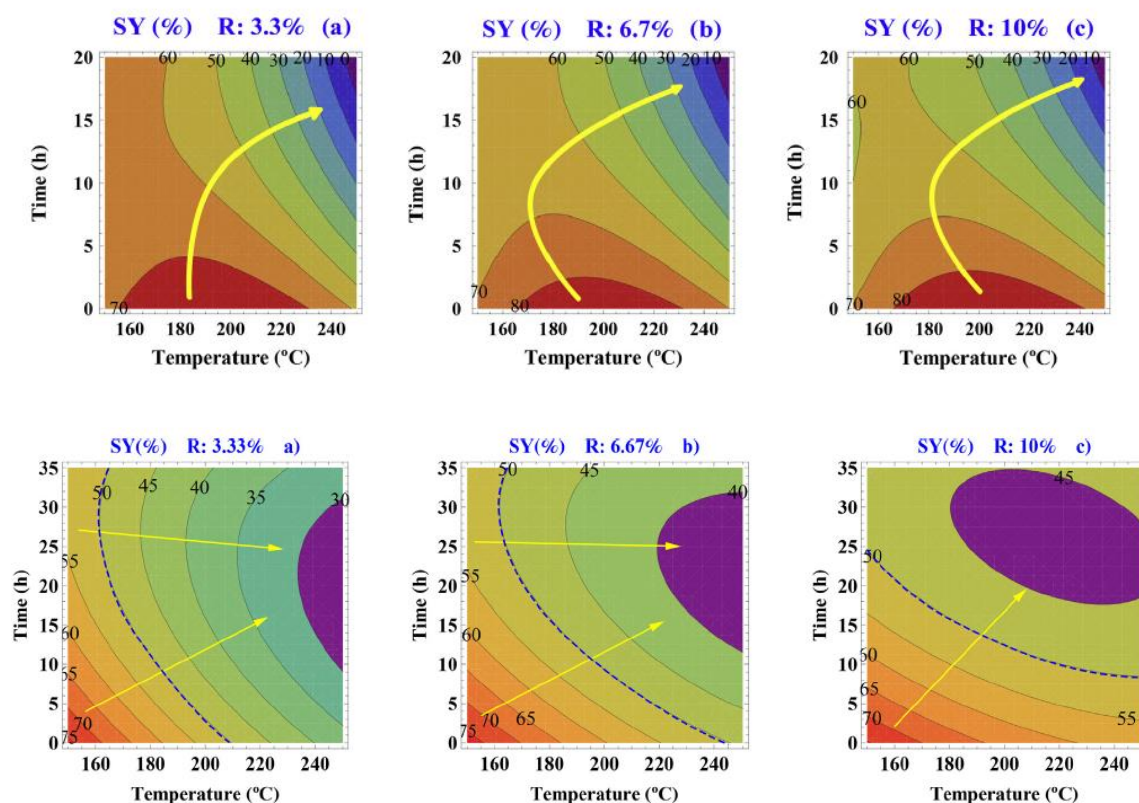

**Figure S1.** SY level curves (Alvarez Murillo et al., 2015)

**Table S1.** Percentage of Collected Papers that Report Specific Hydrochar Properties.

| Hydrochar Property         | % Collected Papers Reporting this Property |
|----------------------------|--------------------------------------------|
| Yield (% db)               | 70.54                                      |
| Carbon (% db)              | 53.57                                      |
| Hydrogen (% db)            | 46.43                                      |
| Oxygen (% db)              | 38.39                                      |
| Nitrogen (% db)            | 31.25                                      |
| Sulfur (% db)              | 16.07                                      |
| Energy content (MJ/kg, db) | 42.86                                      |

**Table S2.** Influence of changing feedstocks in relevant collected carbonization studies.

| Feedstock                                                              | Washed Solids? | Process Conditions Evaluated |            |             | General carbonization product trends associated with changing process conditions                                                                                                                                                                        | Ref.                          |
|------------------------------------------------------------------------|----------------|------------------------------|------------|-------------|---------------------------------------------------------------------------------------------------------------------------------------------------------------------------------------------------------------------------------------------------------|-------------------------------|
|                                                                        |                | % Solids                     | Temp. (°C) | Time (min)* |                                                                                                                                                                                                                                                         |                               |
| Anaerobically digested sludge, Industrial sludge                       | Yes            | 2.47, 2.67                   | 200        | 1440        | Feedstock types influence the %C in char                                                                                                                                                                                                                | (Alatalo et al., 2013)        |
| Glucose, lactose, olive waste, hazel nutshell                          | Yes            | 4.77                         | 180        | 240         | Solids generated from saccharides have different chemical structure than those generated from glucose or lactose. Chars from glucose and lactose have furanic chains; chars from olive oil waste and hazel nutshells have mainly an aromatic structure. | (Aydincak et al., 2012)       |
| Paper, food, mixed MSW, anaerobic digestion solids                     | No             | 20                           | 250        | 1200        | Feedstock composition influences product composition<br>Higher solid-phase carbon contents were found in hydrochar formed from food waste than other feedstocks evaluated                                                                               | (Berge et al., 2011)          |
| Wood chips, Digestate, Straw, Grass                                    | No             | 10                           | 180        | 480         | Feedstock types influence the %C in char                                                                                                                                                                                                                | (Eibisch et al., 2013)        |
| Straw, Digestate                                                       | No             | 5                            | 230        | 522.5       | Feedstock types influence the char carbon                                                                                                                                                                                                               | (Funke et al., 2013b)         |
| Wheat straw, rice straw, cotton stem, water hyacinth, pine sawdust     | No             | 3.5                          | 240        | 240         | Feedstock type influences the solid yields, char carbon and energy content of recovered solids                                                                                                                                                          | (Gao et al., 2016)            |
| Cellulose, saw dust, lignin, rice husk                                 | Yes            | 14.31                        | 280        | 102         | Feedstock type influences gas composition.                                                                                                                                                                                                              | (Karagöz et al., 2005)        |
| Sawdust from pine                                                      | Yes            | 14.29, 25                    | 280        | 100         | Initial solids concentration has an important effect on product distribution and composition of oil products. Solids yields increases with initial solids concentration.                                                                                | (Karagöz et al., 2006)        |
| Food waste, yard waste, paper                                          | No             | 20                           | 250        | 120-1440    | Feedstock type influences the carbon distribution in different phases<br>Feedstock type influences the solid yields, char carbon and energy content of recovered solids                                                                                 | (Li et al., 2014)             |
| Coconut fibers, Eucalyptus leaves                                      | No             | 9.11                         | 250        | 30          | Feedstock types influence the solids yield and energy content of recovered solids                                                                                                                                                                       | (Liu & Balasubramanian, 2013) |
| Japanese MSW, Indian MSW                                               | No             | 50                           | 220        | 30          | Energy densities increase as a result of carbonization.                                                                                                                                                                                                 | (Lu et al., 2011)             |
| Cellulose, glucose, starch, xylose, lignin, corn, paper, pine wood     | No             | 20                           | 250        | 30-5760     | Feedstock types influences the char yields and product distribution                                                                                                                                                                                     | (Lu & Berge, 2014)            |
| Agricultural Residues, Industrial Organic Waste, Agricultural Residues | No             | 15                           | 220        | 390         | Feedstock type influences the solid yields and energy content of recovered solids                                                                                                                                                                       | (Oliveira et al., 2013)       |
| Sewage sludge, Low rank                                                | Yes            | 4.05, 9.09                   | 250        | 15          | Feedstock types influence the char carbon and energy content of recovered solids                                                                                                                                                                        | (Parshetti et al., 2013b)     |

|                                  |     |       |     |        |                                                                                                             |                        |
|----------------------------------|-----|-------|-----|--------|-------------------------------------------------------------------------------------------------------------|------------------------|
| Indonesian coal                  |     |       |     |        |                                                                                                             |                        |
| Eucalyptus sawdust, barley straw | Yes | 13.82 | 250 | 176.25 | Chemical composition of collected hydrochars was similar                                                    | (Sevilla et al., 2011) |
| Beech wood chips                 | No  | 47.12 | 210 | 240    | Chemical composition of the hydrochars generated from these feedstocks was similar                          | (Tremel et al., 2012)  |
| Corn stalk, tamarix ramosissima  | Yes | 9.11  | 250 | 296.25 | Recovered solids composition is similar. Liquid composition differs slightly from the different feedstocks. | (Xiao et al., 2012)    |

\*reaction times in this table have been corrected to include the heating time; unless otherwise noted, a time = 0 represents the time when heating commences

**Table S3.** Influence of process related parameters in relevant collected carbonization studies.

| Feedstock                                                            | Washed Solids? | Process Conditions Evaluated |            |             | General carbonization product trends associated with changing process conditions                                                                                                                                                                                | Ref.                           |
|----------------------------------------------------------------------|----------------|------------------------------|------------|-------------|-----------------------------------------------------------------------------------------------------------------------------------------------------------------------------------------------------------------------------------------------------------------|--------------------------------|
|                                                                      |                | % Solids                     | Temp. (°C) | Time (min)* |                                                                                                                                                                                                                                                                 |                                |
| Cherry Stones                                                        | Yes            | 9.11                         | 200-300    | 0-30        | <ul style="list-style-type: none"> <li>• Solid yields decrease with increases in temperature and time; time influences product distribution</li> <li>• The energy content of residuals increased with reaction temperature at the same reaction time</li> </ul> | (Akalin et al., 2012)          |
| Olive stone                                                          | No             | 6.25                         | 200-250    | 192-2208    | <ul style="list-style-type: none"> <li>• Solid yields decrease with increasing time</li> <li>• Energy content increases with increasing temperature and time</li> </ul>                                                                                         | (Álvarez-Murillo et al., 2015) |
| Fructose                                                             | No             | 0.89                         | 200-300    | 0.5-15      | <ul style="list-style-type: none"> <li>• Temperature has a strong influence on liquid product composition</li> <li>• Reaction time also influenced product composition</li> </ul>                                                                               | (Asghari & Yoshida, 2006)      |
| Digestate, Wheat Straw, and Pine, Poplar, Masanduba, and Garapa Wood | No             | 5.06                         | 190-270    | 453-469     | <ul style="list-style-type: none"> <li>• Solid yields decrease with increasing temperature and time</li> </ul>                                                                                                                                                  | (Becker et al., 2013)          |
| Fresh olive mill waste, fresh orange juice waste                     | No             | 20.59, 29.29                 | 200-250    | 120-1440    | <ul style="list-style-type: none"> <li>• Solid yields decrease with increasing temperature and time</li> <li>• Char carbon increases with temperature and time</li> <li>• Energy content increases with temperature and time</li> </ul>                         | (Benavente et al., 2015)       |
| Grape marc                                                           | No             | 16                           | 180-250    | 77.5-497.5  | <ul style="list-style-type: none"> <li>• Solid yields decrease with increasing temperature and time</li> <li>• Energy content increases with temperature and time</li> </ul>                                                                                    | (Basso et al., 2016)           |
| Sugar beet pulp, Bark mulch                                          | No             | 20                           | 200-250    | 205-1228    | <ul style="list-style-type: none"> <li>• Temperature has more influence on hydrochar characteristics than time</li> <li>• %C in char increases with temperature and time</li> </ul>                                                                             | (Cao et al., 2013)             |
| Eucalyptus wood                                                      | Yes            | 10                           | 180-190    | 17.5        | <ul style="list-style-type: none"> <li>• Solid yields decrease with increasing temperature</li> </ul>                                                                                                                                                           | (Chang et al., 2013)           |

|                                                         |     |          |          |          |                                                                                                                                                                                                                                   |                              |
|---------------------------------------------------------|-----|----------|----------|----------|-----------------------------------------------------------------------------------------------------------------------------------------------------------------------------------------------------------------------------------|------------------------------|
| Sugarcane<br>Bagasse                                    | Yes | 9.11     | 180      | 5-30     | <ul style="list-style-type: none"> <li>The energy density of the hydrochar increases with reaction time</li> </ul>                                                                                                                | (Chen et al., 2012)          |
| Algae ( <i>C. fragile</i> )                             | Yes | 6.52     | 180-240  | 10       | <ul style="list-style-type: none"> <li>Reaction time and temperature influence the liquid composition and product distribution/composition</li> </ul>                                                                             | (Daneshvar et al., 2012)     |
| Primary sewage<br>sludge                                | No  | 4-25     | 190-200  | 45-255   | <ul style="list-style-type: none"> <li>Energy content of the solids increases with temperature and time</li> <li>Solid yields increase with the solid concentration</li> </ul>                                                    | (Danso-Boateng et al., 2013) |
| Algae                                                   | Yes | 20       | 200, 225 | 10-60    | <ul style="list-style-type: none"> <li>Solid yields decrease with reaction temperature and time</li> </ul>                                                                                                                        | (Du et al., 2012)            |
| Sewage sludge                                           | No  | 22, 9    | 190-220  | 300, 420 | <ul style="list-style-type: none"> <li>Increases in reaction time may result in higher heating values</li> </ul>                                                                                                                  | (Escala et al., 2013)        |
| Glucose, cellulose,<br>rye straw, pure<br>alcell lignin | Yes | 9.11     | 180-280  | 1440     | <ul style="list-style-type: none"> <li>Solid yields decrease and carbon content of the hydrochar increase with increasing temperature</li> <li>Solids oxygen content decreases with reaction temp.</li> </ul>                     | (Falco et al., 2011a)        |
| Carbonized wood<br>materials                            | No  | 25       | 200, 300 | 1200     | <ul style="list-style-type: none"> <li>Solid yields decrease with increasing temperature</li> </ul>                                                                                                                               | (Fujino et al., 2002)        |
| Fresh wheat straw,<br>Digested wheat<br>straw           | Yes | 5.8, 5.5 | 190-250  | 415-435  | <ul style="list-style-type: none"> <li>Solid yields decrease with increasing temperature</li> <li>Feedstock types influence the solid yields</li> </ul>                                                                           | (Funke et al., 2013a)        |
| Water hyacinth                                          | Yes | 5.66     | 240      | 143-1513 | <ul style="list-style-type: none"> <li>Energy content of recovered solids increases with time</li> </ul>                                                                                                                          | (Gao et al., 2013)           |
| Rabbit food                                             | Yes | NR       | 250, 300 | 0.33-2.5 | <ul style="list-style-type: none"> <li>Solid yields decrease with increasing temperature</li> <li>HMF yields increase with time</li> </ul>                                                                                        | (Goto et al., 2004)          |
| Sewage sludge                                           | Yes | 14.3     | 200      | 240-720  | <ul style="list-style-type: none"> <li>Carbon content of the hydrochar decreases with time</li> </ul>                                                                                                                             | (He et al., 2013)            |
| Various<br>microalgae                                   | Yes | 5-12.5   | 190-213  | 75-180   | <ul style="list-style-type: none"> <li>Solids concentration is statistically significant</li> <li>Solid yields increase with increasing initial solids concentration and decrease with increasing time and temperature</li> </ul> | (Heilmann et al., 2010)      |
| Corn distiller's<br>grains                              | Yes | 5-25     | 190-210  | 75-150   | <ul style="list-style-type: none"> <li>Solid yields increase with initial solids concentration and decrease with increasing temperature</li> <li>Carbon content of the hydrochar increases with reaction time</li> </ul>          | (Heilmann et al., 2011)      |

|                                                                  |     |             |          |           |                                                                                                                                                                                                                                                                       |                                          |
|------------------------------------------------------------------|-----|-------------|----------|-----------|-----------------------------------------------------------------------------------------------------------------------------------------------------------------------------------------------------------------------------------------------------------------------|------------------------------------------|
| Mixture of Jeffrey pine and white fir                            | Yes | 11.11       | 215-295  | 65-120    | <ul style="list-style-type: none"> <li>Increases in temperature and time increase gas and liquid products; solid yields decrease</li> <li>Energy density of the char increases with reaction severity (e.g., time and temp)</li> </ul>                                | (Hoekman et al., 2011)                   |
| Paper, dog food, wood, plastics                                  | No  | 25.04       | 234, 295 | 80        | <ul style="list-style-type: none"> <li>Carbon and energy content of the char increases as temperature increases; solid yields also increase</li> </ul>                                                                                                                | (Hwang et al., 2012)                     |
| Empty fruit bunches                                              | Yes | 6.25        | 180-220  | 100-1420  | <ul style="list-style-type: none"> <li>Energy and carbon content of the solids increase with time</li> <li>Carbon content of the solids increases with increasing temperature, while the oxygen content of the solids decrease with increasing temperature</li> </ul> | (Jamari & Howse, 2012)                   |
| Miscanthus                                                       | No  | 6.91, 12.90 | 190-260  | 5-30      | <ul style="list-style-type: none"> <li>Solid yields decrease with increasing time and decreasing concentration</li> <li>Energy content increases with time</li> </ul>                                                                                                 | (Kambo & Dutta, 2015)                    |
| Black liquor solids, lignin, cellulose, D-xylose, pine wood meal | No  | 20, 25      | 220-285  | 480, 1200 | <ul style="list-style-type: none"> <li>Solid yields decrease with increasing temperature</li> <li>Feedstock composition influences yields: lignin &gt; WM &gt; cellulose &gt; D-xylose</li> </ul>                                                                     | (Kang et al., 2012a; Kang et al., 2012b) |
| Coconut meal                                                     | No  | 9.09        | 200-250  | 17-252    | <ul style="list-style-type: none"> <li>Solid yields increase with increasing time and temperature</li> </ul>                                                                                                                                                          | (Khuwijtjaru et al., 2012)               |
| Glucose                                                          | Yes | 3.5-16.5    | 300, 350 | 5-10,000  | <ul style="list-style-type: none"> <li>Time and temp influence product distribution; time plays a more important role during early times.</li> <li>Solid yields decrease with increasing time and temperature</li> </ul>                                              | (Knežević et al., 2009)                  |
| Glucose, wood, pyrolysis oil, sawdust                            | Yes | 3.6-43      | 250-350  | 2-60      | <ul style="list-style-type: none"> <li>Time and temp influence product distribution; Time plays a more important role during early times.</li> <li>Solid yields decrease with increasing time and temp.</li> </ul>                                                    | (Knežević et al., 2010)                  |
| Wood slurry                                                      | Yes | 10          | 200-300  | 21        | <ul style="list-style-type: none"> <li>Product distribution depends on reaction temperature; carbon content increases with increasing temp., while the oxygen content decreases with increasing temperature</li> </ul>                                                | (Kobayashi et al., 2008)                 |

|                                                                    |     |       |          |            |                                                                                                                                                                                                                                                                                                                            |                           |
|--------------------------------------------------------------------|-----|-------|----------|------------|----------------------------------------------------------------------------------------------------------------------------------------------------------------------------------------------------------------------------------------------------------------------------------------------------------------------------|---------------------------|
| Micro crystalline cellulose                                        | No  | 1.94  | 250-350  | 2          | <ul style="list-style-type: none"> <li>Carbon and energy content of the char increases with temperature</li> </ul>                                                                                                                                                                                                         | (Kong et al., 2013)       |
| Baker's yeast                                                      | No  | 10    | 200, 250 | 5-30       | <ul style="list-style-type: none"> <li>Solid yields decrease with increasing temperature and time</li> </ul>                                                                                                                                                                                                               | (Lamoolphak et al., 2006) |
| Silk fibroin fiber                                                 | No  | 1 - 5 | 180-250  | 10-60      | <ul style="list-style-type: none"> <li>Solid yields decrease with increasing reaction temp and time</li> </ul>                                                                                                                                                                                                             | (Lamoolphak et al., 2008) |
| Food waste, packaging materials                                    | No  | 5-41  | 225-275  | 30-5760    | <ul style="list-style-type: none"> <li>Initial solids concentration and time influence carbon distribution</li> <li>Temperature has a small influence on carbon distribution when carbonizing food</li> <li>Presence of packaging materials greatly influences hydrochar energy content and carbon distribution</li> </ul> | (Li et al., 2013)         |
| Food waste, yard waste, paper                                      | No  | 20    | 250      | 120-1440   | <ul style="list-style-type: none"> <li>Solid yields decrease with increasing time</li> </ul>                                                                                                                                                                                                                               | (Li et al., 2014)         |
| Seaweed, horse manure                                              | No  | NR    | 205      | 1350, 1430 | <ul style="list-style-type: none"> <li>Feedstock type influences energy content of recovered solids</li> </ul>                                                                                                                                                                                                             | (Lilliestråle, 2007)      |
| Cypress                                                            | Yes | 9.09  | 260      | 69-99      | <ul style="list-style-type: none"> <li>Percent carbon and energy content of solids increase with time</li> </ul>                                                                                                                                                                                                           | (Liu et al., 2013a)       |
| Coconut fiber, eucalyptus leaves                                   | No  | 9.09  | 200-350  | 30         | <ul style="list-style-type: none"> <li>Energy density increases with increasing temperature, while the solid yields decrease</li> </ul>                                                                                                                                                                                    | (Liu et al., 2013b)       |
| Cellulose                                                          | No  | 20    | 225-275  | 30-5760    | <ul style="list-style-type: none"> <li>Temperature and time have great influence on cellulose carbonization at early times</li> <li>Reaction time influences the composition of gas-phase and liquid-phase</li> </ul>                                                                                                      | (Lu et al., 2013)         |
| Paper, food, MSW,                                                  | No  | 20    | 250      | 120-7200   | <ul style="list-style-type: none"> <li>Product distribution changes with time: solid yields decrease until reaching a stable level; gas carbon increases with increasing time, while the liquid increases and then decreases</li> </ul>                                                                                    | (Lu et al., 2012)         |
| Cellulose, glucose, starch, xylose, lignin, corn, paper, pine wood | No  | 20    | 250      | 30-5760    | <ul style="list-style-type: none"> <li>Reaction time influences the composition of gas-phase, liquid-phase and solid phase</li> <li>Reaction time influences solid yields, char carbon and energy content of recovered solids</li> </ul>                                                                                   | (Lu & Berge, 2014)        |

|                                                           |     |           |          |            |                                                                                                                                                                                                                           |                               |
|-----------------------------------------------------------|-----|-----------|----------|------------|---------------------------------------------------------------------------------------------------------------------------------------------------------------------------------------------------------------------------|-------------------------------|
| Water lettuce                                             | Yes | 5.4       | 200, 250 | 30, 60     | <ul style="list-style-type: none"> <li>Greater solids hydrolysis occurs when the reactions were conducted at a higher temperatures or longer times; protein solubility in water increases with increasing temp</li> </ul> | (Luo et al., 2011)            |
| Cellulose                                                 | Yes | 0.99      | 185      | 25-110     | <ul style="list-style-type: none"> <li>Carbon content in the liquid increases and then decreases with reaction time</li> </ul>                                                                                            | (Möller et al., 2013)         |
| Starch                                                    | Yes | 9.11      | 180-240  | 11 - 12    | <ul style="list-style-type: none"> <li>Solid yields increase with increasing temperature and decrease with increasing time</li> </ul>                                                                                     | (Nagamori & Funazukuri, 2004) |
| Empty fruit bunch                                         | Yes | 9.09      | 250, 350 | 20         | <ul style="list-style-type: none"> <li>Percent carbon and energy content of solids increase with temperature</li> <li>Solid yields decrease with increasing temperature</li> </ul>                                        | (Parshetti et al., 2013a)     |
| Cellulose                                                 | Yes | 9.09      | 220-350  | 25-91      | <ul style="list-style-type: none"> <li>Temperature influences the product distribution</li> <li>Solid yields decrease with increasing time</li> </ul>                                                                     | (Pavlovic et al., 2013)       |
| Alkali lignin                                             | Yes | 5         | 280      | 26 -266    | <ul style="list-style-type: none"> <li>Increasing temperature and time increase secondary reactions</li> </ul>                                                                                                            | (Pinkowska et al., 2012)      |
| Rice bran                                                 | Yes | 14.29     | 180-320  | 5          | <ul style="list-style-type: none"> <li>Temperature influences liquid composition; more feedstock is solubilized at higher temperatures</li> </ul>                                                                         | (Pourali et al., 2009)        |
| Japonica-type rice                                        | Yes | 14.29     | 200-340  | 22 - 50    | <ul style="list-style-type: none"> <li>Total phenolic content and antioxidant activity increases with temperature and time</li> </ul>                                                                                     | (Pourali et al., 2010)        |
| Corn stover,<br>Miscanthus,<br>Switch grass, Rice<br>hull | No  | 16.7      | 200-260  | 44         | <ul style="list-style-type: none"> <li>Energy content of solids increases with temperature, while the solid yields decrease with increasing temperature</li> </ul>                                                        | (Reza et al., 2013a)          |
| Loblolly pine                                             | Yes | 1.96      | 200-260  | 25-310     | <ul style="list-style-type: none"> <li>Energy content of recovered solids increases with increasing temperature and time</li> <li>Solid yields decrease with increasing temperature and time</li> </ul>                   | (Reza et al., 2013b)          |
| Maize silage                                              | No  | 6.70      | 200-250  | 78.3-435   | <ul style="list-style-type: none"> <li>Solid yields decrease with increasing time</li> <li>Energy content of recovered solids increases with increasing time</li> </ul>                                                   | (Reza et al., 2014)           |
| Walnut shell,<br>sunflower stem                           | Yes | 3.23-4.77 | 190, 230 | 1200, 2700 | <ul style="list-style-type: none"> <li>Temperature and initial solids concentration were more influential on product formation than time</li> </ul>                                                                       | (Román et al., 2012)          |

|                                         |     |            |          |          |                                                                                                                                                                                                                                                             |                           |
|-----------------------------------------|-----|------------|----------|----------|-------------------------------------------------------------------------------------------------------------------------------------------------------------------------------------------------------------------------------------------------------------|---------------------------|
|                                         |     |            |          |          | <ul style="list-style-type: none"> <li>Higher temperature results in greater energy content of the solids</li> <li>Greater ratio of feedstock to water results in lower solid yields</li> <li>Sunflower stem was more reactive than walnut shell</li> </ul> |                           |
| Tomato peel                             | No  | 1.09-10.09 | 200, 230 | 96-1104  | <ul style="list-style-type: none"> <li>Solid yields and energy content increase with initial solid concentration</li> </ul>                                                                                                                                 | (Sabio et al., 2016)      |
| Onion bulbs,<br>Onion skins             | Yes | 4.62, 9.09 | 180-290  | 5        | <ul style="list-style-type: none"> <li>Temperature influences liquid composition</li> <li>Char carbon content increases with temperature</li> </ul>                                                                                                         | (Salak et al., 2013)      |
| Glucose, sucrose,<br>starch             | Yes | 1.58-15.28 | 180-240  | 84-940   | <ul style="list-style-type: none"> <li>Solid yields increase with reaction temperature and initial solids concentration</li> </ul>                                                                                                                          | (Sevilla & Fuertes, 2009) |
| Cellulose                               | Yes | 3.85-24.28 | 230,250  | 120, 240 | <ul style="list-style-type: none"> <li>Solid carbon and yield increase with reaction temperature</li> </ul>                                                                                                                                                 | (Sevilla & Fuertes, 2009) |
| Paulowina                               | Yes | 14.31      | 280-340  | 62-78    | <ul style="list-style-type: none"> <li>Temperature significantly influences the process of biomass liquefaction</li> </ul>                                                                                                                                  | (Sun et al., 2011)        |
| Tofu waste                              | No  | 1.64-14.29 | 200-350  | 30       | <ul style="list-style-type: none"> <li>Temperature was the most significant parameter</li> <li>Gas yields increase with increasing temperature</li> </ul>                                                                                                   | (Tian et al., 2012)       |
| Spirulina,<br>Nannochloropsis<br>salina | No  | 25         | 220-350  | 90-180   | <ul style="list-style-type: none"> <li>Solid yields decrease with the increase of temperature</li> <li>Feedstock type influences the solid yields and energy content of the recovered solids</li> </ul>                                                     | (Toor et al., 2013)       |
| Tamarix<br>ramosissima                  | Yes | 9          | 180-240  | 30-40    | <ul style="list-style-type: none"> <li>Solid yields decrease with increasing temperature</li> </ul>                                                                                                                                                         | (Xiao et al., 2013)       |
| Loblolly pine                           | No  | 16.7       | 200-260  | 20-35    | <ul style="list-style-type: none"> <li>Increasing temperature results in decreased mass yield and increased energy densification</li> <li>Solids carbon content increases with temperature, while the oxygen content decreases</li> </ul>                   | (Yan et al., 2009)        |
| Cellulose                               | No  | 3.23       | 275-320  | 57-87    | <ul style="list-style-type: none"> <li>HMF yields increase and decrease with increasing temperature</li> <li>Solids yields decrease with increasing time</li> </ul>                                                                                         | (Yin et al., 2011)        |

|                   |    |      |         |        |                                                                                                                                                                                                                                        |                      |
|-------------------|----|------|---------|--------|----------------------------------------------------------------------------------------------------------------------------------------------------------------------------------------------------------------------------------------|----------------------|
| Corn cob residues | No | 9.09 | 190-350 | 60-360 | <ul style="list-style-type: none"> <li>• Solid yields decrease with increasing temperature</li> <li>• Char carbon content increases with temperature and time</li> <li>• Energy content increases with temperature and time</li> </ul> | (Zhang et al., 2015) |
|-------------------|----|------|---------|--------|----------------------------------------------------------------------------------------------------------------------------------------------------------------------------------------------------------------------------------------|----------------------|

\*reaction times in this table have been corrected to include the heating time; unless otherwise noted, a time = 0 represents the time when heating commences

**Table S4.** Influence of changing feedstocks in relevant collected carbonization studies.

| Feedstock                                                          | Washed Solids? | Process Conditions Evaluated |            |             | General carbonization product trends associated with changing process conditions                                                                                                                                                                                                                                       | Ref.                    |
|--------------------------------------------------------------------|----------------|------------------------------|------------|-------------|------------------------------------------------------------------------------------------------------------------------------------------------------------------------------------------------------------------------------------------------------------------------------------------------------------------------|-------------------------|
|                                                                    |                | % Solids                     | Temp. (°C) | Time (min)* |                                                                                                                                                                                                                                                                                                                        |                         |
| Anaerobically digested sludge, Industrial sludge                   | Yes            | 2.47, 2.67                   | 200        | 1440        | <ul style="list-style-type: none"> <li>• Feedstock types influence the %C in char</li> </ul>                                                                                                                                                                                                                           | (Alatalo et al., 2013)  |
| Glucose, lactose, olive waste, hazel nutshell                      | Yes            | 4.77                         | 180        | 240         | <ul style="list-style-type: none"> <li>• Solids generated from saccharides have different chemical structure than those generated from glucose or lactose.</li> <li>• Chars from glucose and lactose have furanic chains; chars from olive oil waste and hazel nutshells have mainly an aromatic structure.</li> </ul> | (Aydıncak et al., 2012) |
| Paper, food, mixed MSW, anaerobic digestion solids                 | No             | 20                           | 250        | 1200        | <ul style="list-style-type: none"> <li>• Feedstock composition influences product composition</li> <li>• Higher solid-phase carbon contents were found in hydrochar formed from food waste than other feedstocks evaluated</li> </ul>                                                                                  | (Berge et al., 2011)    |
| Wood chips, Digestate, Straw, Grass                                | No             | 10                           | 180        | 480         | <ul style="list-style-type: none"> <li>• Feedstock types influence the %C in char</li> </ul>                                                                                                                                                                                                                           | (Eibisch et al., 2013)  |
| Straw, Digestate                                                   | No             | 5                            | 230        | 522.5       | <ul style="list-style-type: none"> <li>• Feedstock types influence the char carbon</li> </ul>                                                                                                                                                                                                                          | (Funke et al., 2013b)   |
| Wheat straw, rice straw, cotton stem, water hyacinth, pine sawdust | No             | 3.5                          | 240        | 240         | <ul style="list-style-type: none"> <li>• Feedstock type influences the solid yields, char carbon and energy content of recovered solids</li> </ul>                                                                                                                                                                     | (Gao et al., 2016)      |

|                                                                        |     |            |     |          |                                                                                                                                                                                                                                 |                               |
|------------------------------------------------------------------------|-----|------------|-----|----------|---------------------------------------------------------------------------------------------------------------------------------------------------------------------------------------------------------------------------------|-------------------------------|
| Cellulose, saw dust, lignin, rice husk                                 | Yes | 14.31      | 280 | 102      | <ul style="list-style-type: none"> <li>Feedstock type influences gas composition.</li> </ul>                                                                                                                                    | (Karagöz et al., 2005)        |
| Sawdust from pine                                                      | Yes | 14.29, 25  | 280 | 100      | <ul style="list-style-type: none"> <li>Initial solids concentration has an important effect on product distribution and composition of oil products. Solids yields increases with initial solids concentration.</li> </ul>      | (Karagöz et al., 2006)        |
| Food waste, yard waste, paper                                          | No  | 20         | 250 | 120-1440 | <ul style="list-style-type: none"> <li>Feedstock type influences the carbon distribution in different phases</li> <li>Feedstock type influences the solid yields, char carbon and energy content of recovered solids</li> </ul> | (Li et al., 2014)             |
| Coconut fibers, Eucalyptus leaves                                      | No  | 9.11       | 250 | 30       | <ul style="list-style-type: none"> <li>Feedstock types influence the solids yield and energy content of recovered solids</li> </ul>                                                                                             | (Liu & Balasubramanian, 2013) |
| Holocellulose, wood powder                                             | Yes | 1.64       | 210 | 540      | <ul style="list-style-type: none"> <li>Feedstock type influences the char carbon and energy content of recovered solids</li> </ul>                                                                                              | (Liu et al., 2015)            |
| Japanese MSW, Indian MSW                                               | No  | 50         | 220 | 30       | <ul style="list-style-type: none"> <li>Energy densities increase as a result of carbonization.</li> </ul>                                                                                                                       | (Lu et al., 2011)             |
| Cellulose, glucose, starch, xylose, lignin, corn, paper, pine wood     | No  | 20         | 250 | 30-5760  | <ul style="list-style-type: none"> <li>Feedstock types influences the char yields and product distribution</li> </ul>                                                                                                           | (Lu & Berge, 2014)            |
| Agricultural Residues, Industrial Organic Waste, Agricultural Residues | No  | 15         | 220 | 390      | <ul style="list-style-type: none"> <li>Feedstock type influences the solid yields and energy content of recovered solids</li> </ul>                                                                                             | (Oliveira et al., 2013)       |
| Sewage sludge, Low rank Indonesian coal                                | Yes | 4.05, 9.09 | 250 | 15       | <ul style="list-style-type: none"> <li>Feedstock types influence the char carbon and energy content of recovered solids</li> </ul>                                                                                              | (Parshetti et al., 2013b)     |
| Eucalyptus sawdust, barley straw                                       | Yes | 13.82      | 250 | 176.25   | <ul style="list-style-type: none"> <li>Chemical composition of collected hydrochars was similar</li> </ul>                                                                                                                      | (Sevilla et al., 2011)        |
| Beech wood chips                                                       | No  | 47.12      | 210 | 240      | <ul style="list-style-type: none"> <li>Chemical composition of the hydrochars generated from these feedstocks was similar</li> </ul>                                                                                            | (Tremel et al., 2012)         |
| Corn stalk, tamarix ramosissima                                        | Yes | 9.11       | 250 | 296.25   | <ul style="list-style-type: none"> <li>Recovered solids composition is similar.</li> </ul>                                                                                                                                      | (Xiao et al., 2012)           |

|  |  |  |  |  |                                                                                                                      |  |
|--|--|--|--|--|----------------------------------------------------------------------------------------------------------------------|--|
|  |  |  |  |  | <ul style="list-style-type: none"><li>• Liquid composition differs slightly from the different feedstocks.</li></ul> |  |
|--|--|--|--|--|----------------------------------------------------------------------------------------------------------------------|--|

\*reaction times in this table have been corrected to include the heating time; unless otherwise noted, a time = 0 represents the time when heating commences
